# Supplementary material
Source: MDPI journal article supplement (https://www.mdpi.com/2073-4441/13/10/1431)
Supplement: s1 [file s1]

**Figures S1-S4.** Fit of the GEV distribution to drought hazard, exposure, vulnerability and risk indices.

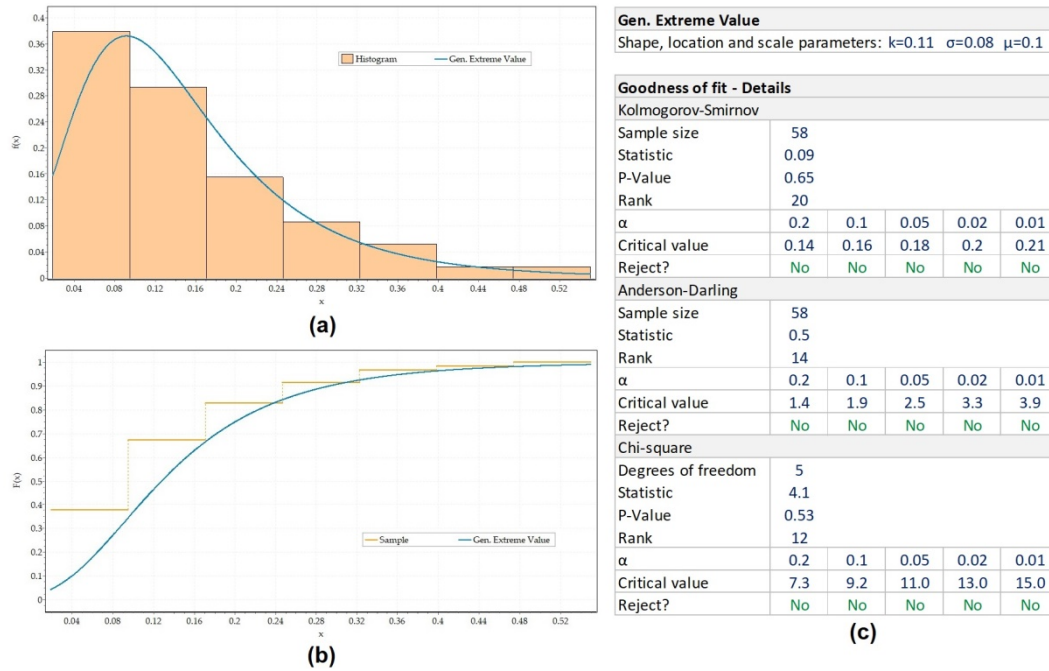

**Figure S1.** Fit of the GEV distribution to drought hazard indices: (a) Probability distribution function; (b) Cumulative distribution function; and (c) Parameters and goodness of fit tests.

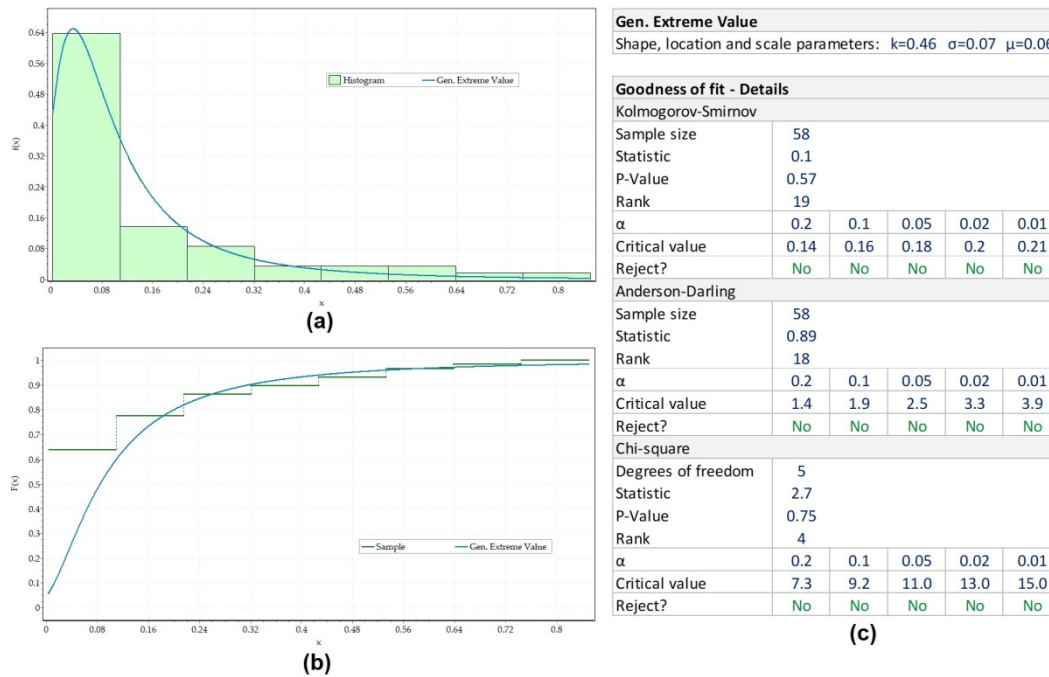

**Figure S2.** Fit of the GEV distribution to drought exposure indices: (a) Probability distribution function; (b) Cumulative distribution function; and (c) Parameters and goodness of fit tests.

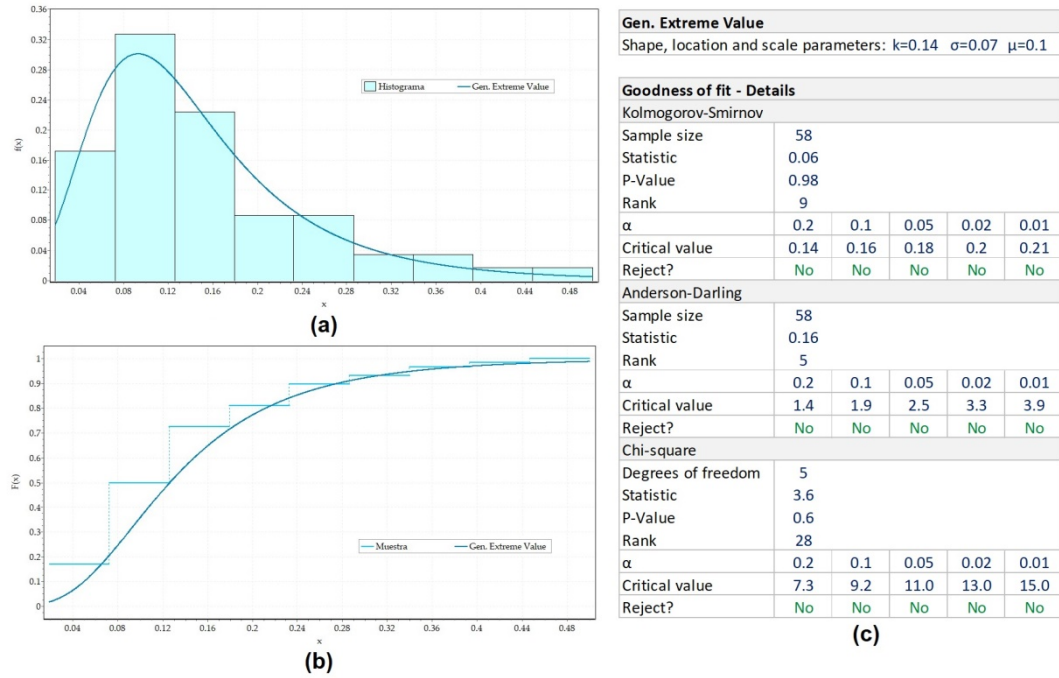

**Figure S3.** Fit of the GEV distribution to drought vulnerability indices: (a) Probability distribution function; (b) Cumulative distribution function; and (c) Parameters and goodness of fit tests.

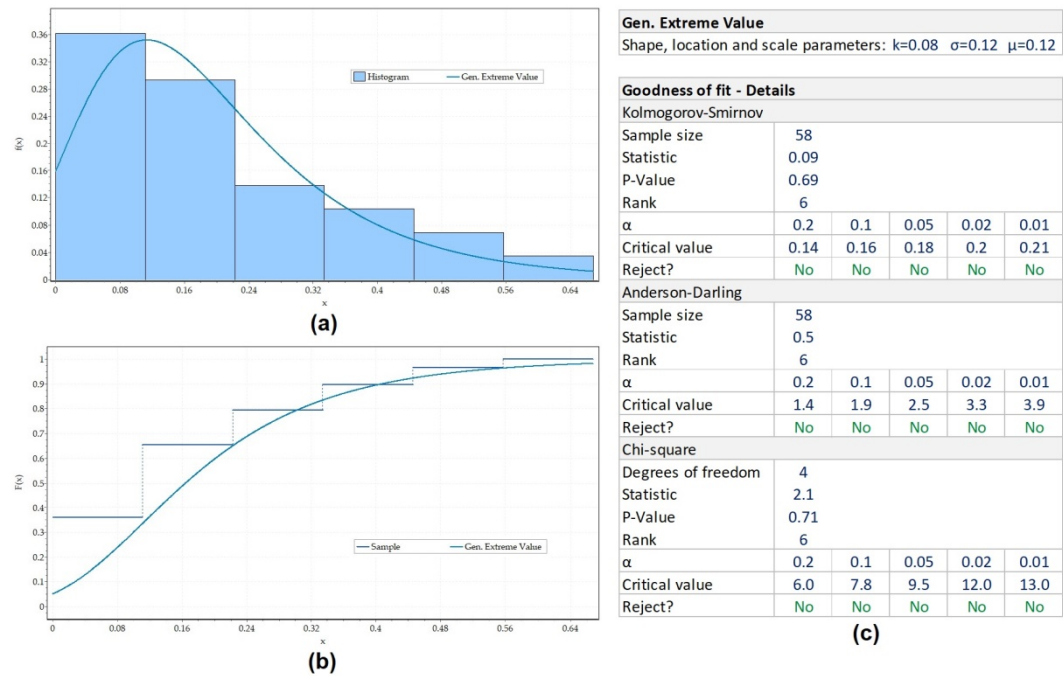

**Figure S4.** Fit of the GEV distribution to drought risk indices: (a) Probability distribution function; (b) Cumulative distribution function; and (c) Parameters and goodness of fit tests.

**Figures S5-S7.** Multicollinearity analysis of drought exposure, sensitivity and adaptive capacity indicators.

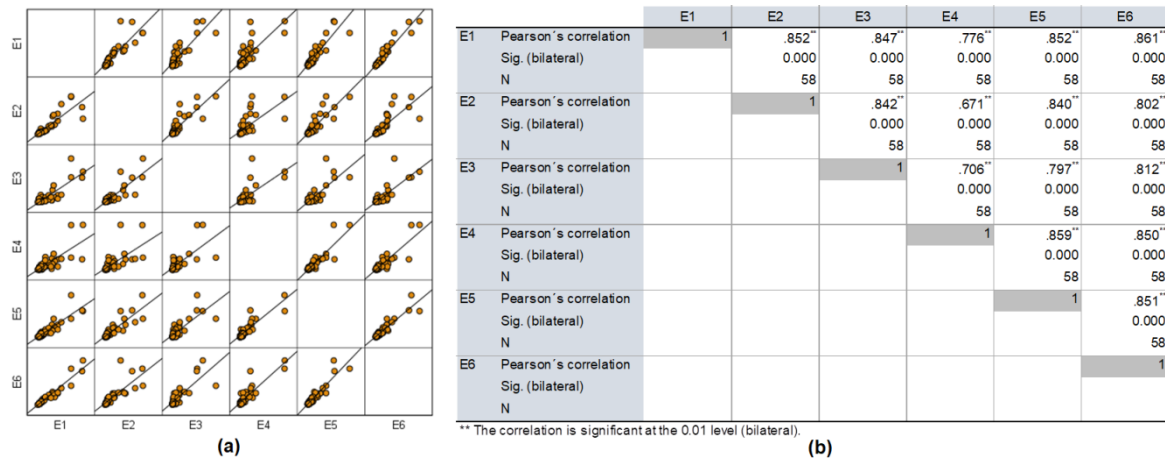

**Figure S5.** Multicollinearity analysis of drought exposure indicators: (a) Correlation charts; and (b) Pearson's correlation coefficients.

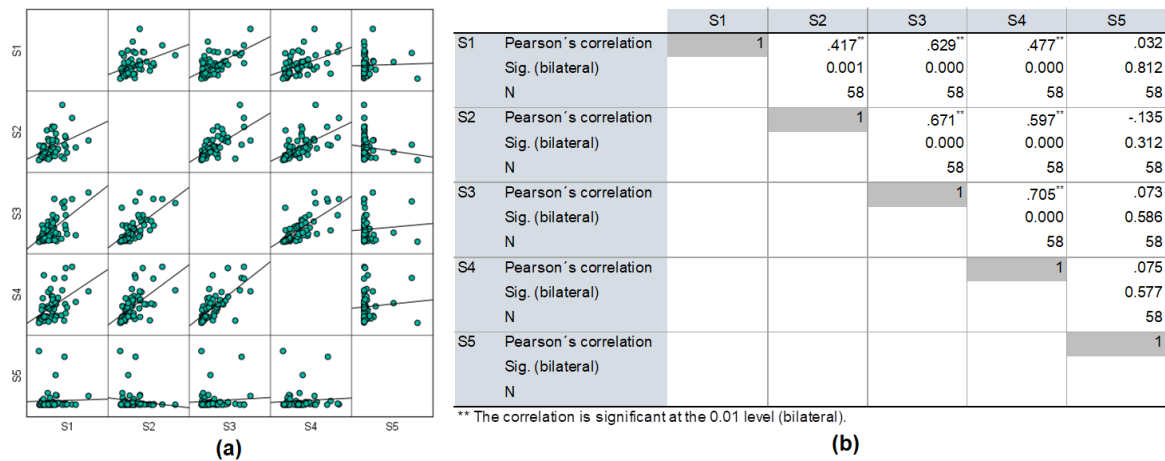

**Figure S6.** Multicollinearity analysis of drought sensitivity indicators: (a) Correlation charts; and (b) Pearson's correlation coefficients.

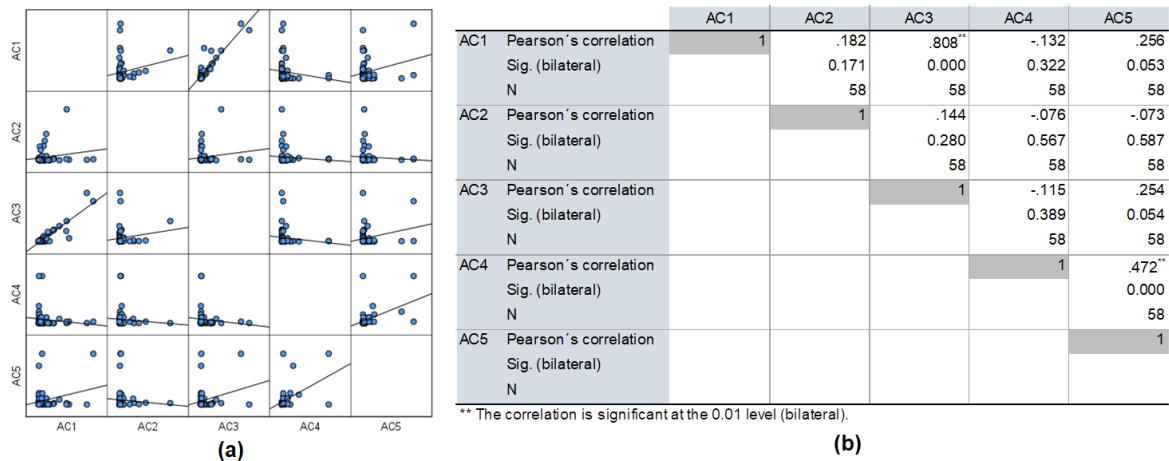

**Figure S7.** Multicollinearity analysis of adaptive capacity indicators: (a) Correlation charts; and (b) Pearson's correlation coefficients.

**Table S1.** Municipalities that comprise the state of Zacatecas.

| No. | Municipality                 | Surface         |         | Population         |         | Rainfed<br>Agricultural Area |         |
|-----|------------------------------|-----------------|---------|--------------------|---------|------------------------------|---------|
|     |                              | Km <sup>2</sup> | % State | No.<br>Inhabitants | % State | ha                           | % State |
| 1   | Apozol                       | 290.04          | 0.4     | 6,260              | 0.4     | 2,836                        | 0.3     |
| 2   | Apulco                       | 200.55          | 0.3     | 4,942              | 0.3     | 1,852                        | 0.2     |
| 3   | Atolinga                     | 278.43          | 0.4     | 2,277              | 0.2     | 2,515                        | 0.2     |
| 4   | Benito Juárez                | 325.66          | 0.4     | 4,493              | 0.3     | 2,535                        | 0.2     |
| 5   | Calera                       | 383.27          | 0.5     | 45,759             | 2.8     | 19,134                       | 1.8     |
| 6   | Cañitas de Felipe Pescador   | 444.59          | 0.6     | 8,255              | 0.5     | 12,914                       | 1.2     |
| 7   | Concepción del Oro           | 2,392.58        | 3.2     | 12,115             | 0.8     | 3,162                        | 0.3     |
| 8   | Cuauhtémoc                   | 320.98          | 0.4     | 13,466             | 0.8     | 4,723                        | 0.4     |
| 9   | Chalchihuites                | 891.11          | 1.2     | 10,086             | 0.7     | 13,990                       | 1.3     |
| 10  | Fresnillo                    | 5,037.31        | 6.8     | 240,532            | 14.6    | 108,182                      | 10.3    |
| 11  | Trinidad García de la Cadena | 304.27          | 0.4     | 3,362              | 0.2     | 1,930                        | 0.2     |
| 12  | Genaro Codina                | 786.42          | 1.1     | 8,168              | 0.5     | 6,339                        | 0.6     |
| 13  | General Enrique Estrada      | 195.57          | 0.3     | 6,644              | 0.4     | 11,375                       | 1.1     |
| 14  | General Fco. R. Murguía      | 4,783.82        | 6.4     | 20,191             | 1.4     | 46,797                       | 4.4     |
| 15  | El Plateado de Joaquín Amaro | 349.99          | 0.5     | 1,579              | 0.1     | 1,650                        | 0.2     |
| 16  | General Pánfilo Natera       | 437.37          | 0.6     | 23,526             | 1.5     | 14,707                       | 1.4     |
| 17  | Guadalupe                    | 808.32          | 1.1     | 211,740            | 12.0    | 28,370                       | 2.7     |
| 18  | Huanusco                     | 368.61          | 0.5     | 4,547              | 0.3     | 4,092                        | 0.4     |
| 19  | Jalpa                        | 710.86          | 1       | 25,296             | 1.5     | 6,365                        | 0.6     |
| 20  | Jerez                        | 1,526.91        | 2.1     | 59,910             | 3.8     | 19,953                       | 1.9     |
| 21  | Jiménez del Teul             | 1,158.41        | 1.6     | 4,465              | 0.3     | 3,370                        | 0.3     |
| 22  | Juan Aldama                  | 616.92          | 0.8     | 19,749             | 1.4     | 26,880                       | 2.6     |
| 23  | Juchipila                    | 335.37          | 0.5     | 12,251             | 0.8     | 3,491                        | 0.3     |
| 24  | Loreto                       | 424.66          | 0.6     | 53,709             | 3.4     | 12,460                       | 1.2     |
| 25  | Luis Moya                    | 175.03          | 0.2     | 13,184             | 0.8     | 4,308                        | 0.4     |
| 26  | Mazapil                      | 11,987.60       | 16.1    | 17,774             | 1.1     | 13,238                       | 1.3     |
| 27  | Melchor Ocampo               | 1,862.05        | 2.5     | 2,736              | 0.2     | 754                          | 0.1     |
| 28  | Mezquital del Oro            | 482.01          | 0.6     | 2,451              | 0.2     | 1,736                        | 0.2     |
| 29  | Miguel Auza                  | 1,093.92        | 1.5     | 23,713             | 1.5     | 54,527                       | 5.2     |
| 30  | Momax                        | 160.17          | 0.2     | 2,446              | 0.2     | 921                          | 0.1     |
| 31  | Monte Escobedo               | 1,582.98        | 2.1     | 8,683              | 0.6     | 6,801                        | 0.6     |
| 32  | Morelos                      | 178.98          | 0.2     | 13,207             | 0.8     | 10,611                       | 1.0     |
| 33  | Moyahua de Estrada           | 535.27          | 0.7     | 4,530              | 0.3     | 3,011                        | 0.3     |
| 34  | Nochistlán de Mejía          | 869.31          | 1.2     | 27,945             | 1.8     | 9,349                        | 0.9     |
| 35  | Noria de Ángeles             | 404.2           | 0.5     | 16,284             | 1.1     | 5,760                        | 0.5     |
| 36  | Ojocaliente                  | 637.99          | 0.9     | 44,144             | 2.7     | 23,433                       | 2.2     |

| No.          | Municipality              | Surface          |              | Population         |              | Rainfed<br>Agricultural Area |              |
|--------------|---------------------------|------------------|--------------|--------------------|--------------|------------------------------|--------------|
|              |                           | Km <sup>2</sup>  | % State      | No.<br>Inhabitants | % State      | ha                           | % State      |
| 37           | Pánuco                    | 674.94           | 0.9          | 17,577             | 1.1          | 21,413                       | 2.0          |
| 38           | Pinos                     | 3,135.80         | 4.2          | 72,241             | 4.6          | 95,086                       | 9.0          |
| 39           | Río Grande                | 1,818.75         | 2.4          | 64,535             | 4.1          | 79,812                       | 7.6          |
| 40           | Sain Alto                 | 1,399.61         | 1.9          | 21,844             | 1.4          | 32,142                       | 3.1          |
| 41           | El Salvador               | 617.24           | 0.8          | 2,509              | 0.2          | 3,202                        | 0.3          |
| 42           | Sombrerete                | 3,593.56         | 4.8          | 63,665             | 3.9          | 141,375                      | 13.4         |
| 43           | Susticacán                | 197.48           | 0.3          | 1,365              | 0.1          | 102                          | 0.0          |
| 44           | Tabasco                   | 406.05           | 0.5          | 16,588             | 1.0          | 3,151                        | 0.3          |
| 45           | Tepechitlán               | 539.12           | 0.7          | 8,321              | 0.6          | 3,255                        | 0.3          |
| 46           | Tepetongo                 | 716.92           | 1            | 6,490              | 0.4          | 4,094                        | 0.4          |
| 47           | Teúl de González Ortega   | 673.05           | 0.9          | 5,356              | 0.3          | 4,115                        | 0.4          |
| 48           | Tlaltenango de Sánchez R. | 738.55           | 1            | 27,302             | 1.7          | 3,846                        | 0.4          |
| 49           | Valparaíso                | 5,647.40         | 7.6          | 32,461             | 2.1          | 25,840                       | 2.5          |
| 50           | Vetagrande                | 158.24           | 0.2          | 10,276             | 0.6          | 6,923                        | 0.7          |
| 51           | Villa de Cos              | 6,597.04         | 8.9          | 34,623             | 2.2          | 67,232                       | 6.4          |
| 52           | Villa García              | 338.23           | 0.5          | 19,525             | 1.2          | 8,011                        | 0.8          |
| 53           | Villa González Ortega     | 427.38           | 0.6          | 13,208             | 0.8          | 14,000                       | 1.3          |
| 54           | Villa Hidalgo             | 371.43           | 0.5          | 19,446             | 1.2          | 9,185                        | 0.9          |
| 55           | Villanueva                | 2,156.51         | 2.9          | 31,558             | 1.9          | 19,114                       | 1.8          |
| 56           | Zacatecas                 | 436.79           | 0.6          | 149,607            | 9.3          | 7,497                        | 0.7          |
| 57           | Trancoso                  | 218.45           | 0.3          | 20,455             | 1.2          | 8,427                        | 0.8          |
| 58           | Santa María de la Paz     | 275.67           | 0.4          | 2,767              | 0.2          | 1,917                        | 0.2          |
| <b>Total</b> |                           | <b>74,479.71</b> | <b>100.0</b> | <b>1,622,138</b>   | <b>100.0</b> | <b>1,053,807</b>             | <b>100.0</b> |

Source: Developed by the authors with information from INEGI and SIAP.
